# Supplementary material for: Cobalt aluminate nanoparticles supported on MIL-101 structure: catalytic performance investigation
Source: Royal Society of Chemistry journal article supplement (doi:10.1039/c4ra10498f), 2014-12-04
Supplement: c4ra10498f1.pdf [file c4ra10498f1.pdf]

## SUPPORTING INFORMATION

### Cobalt Aluminate Nanoparticles Supported on MIL-101 Structure: Catalytic Performance Investigation

Carlos M. Granadeiro,<sup>a\*</sup> Mohamed Karmaoui,<sup>b</sup> Eva Correia,<sup>a</sup> Diana Julião,<sup>a</sup> Vitor S. Amaral,<sup>b</sup> Nuno J.O. Silva,<sup>b</sup> Luís Cunha-Silva<sup>a</sup> and Salette S. Balula<sup>a\*</sup>

<sup>a</sup> REQUIMTE & Department of Chemistry and Biochemistry, Faculty of Sciences,  
University of Porto, 4169-007 Porto, Portugal

<sup>b</sup> CICECO & Department of Physics, University of Aveiro, 3810-193 Aveiro, Portugal

Corresponding authors: Dr Carlos M. Granadeiro and Dr. Salette S. Balula; e-mail: [cgranadeiro@fc.up.pt](mailto:cgranadeiro@fc.up.pt),  
[sbalula@fc.up.pt](mailto:sbalula@fc.up.pt); Tel.: +351 220402576; Fax: +351 220402659

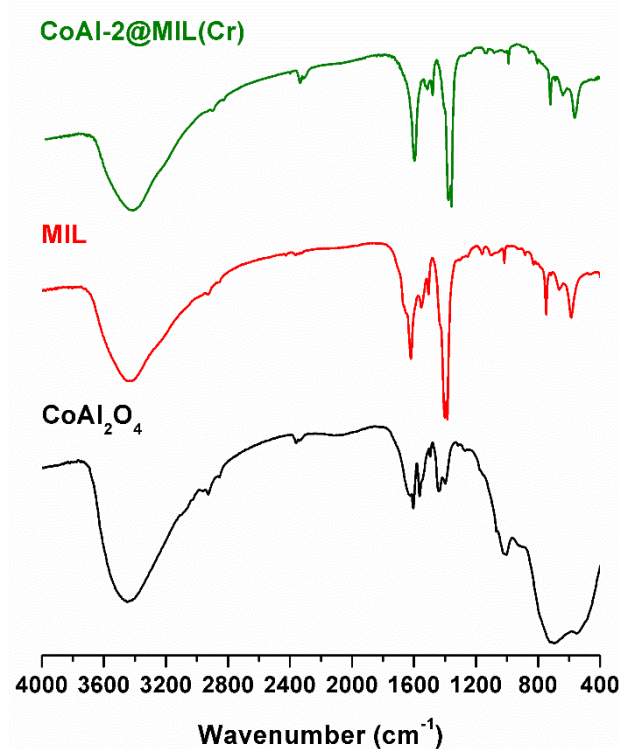

**Figure S1.** FT-IR spectra of CoAl<sub>2</sub>O<sub>4</sub> nanoparticles, the solid support MIL-101 and the CoAl-2@MIL(Cr) composite.

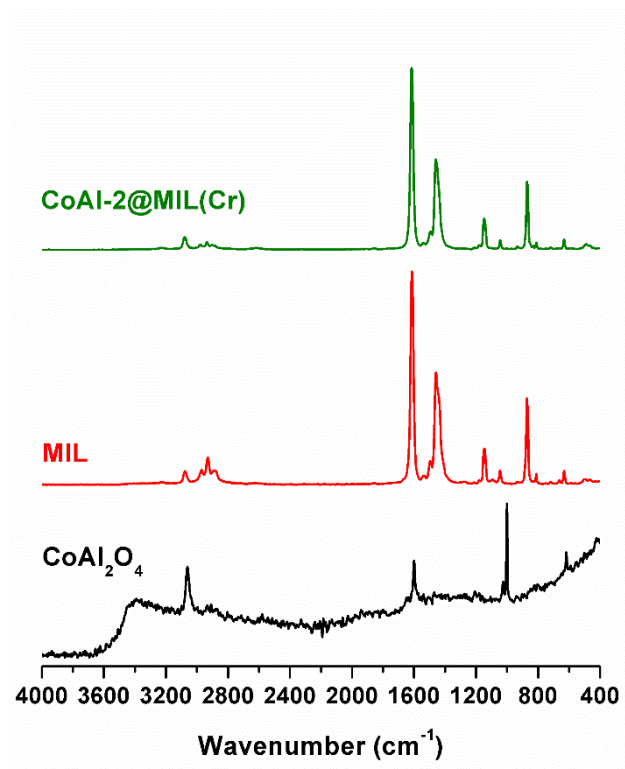

**Figure S2.** FT-Raman spectra of CoAl<sub>2</sub>O<sub>4</sub> nanoparticles, the solid support MIL-101 and the CoAl-2@MIL(Cr) composite.

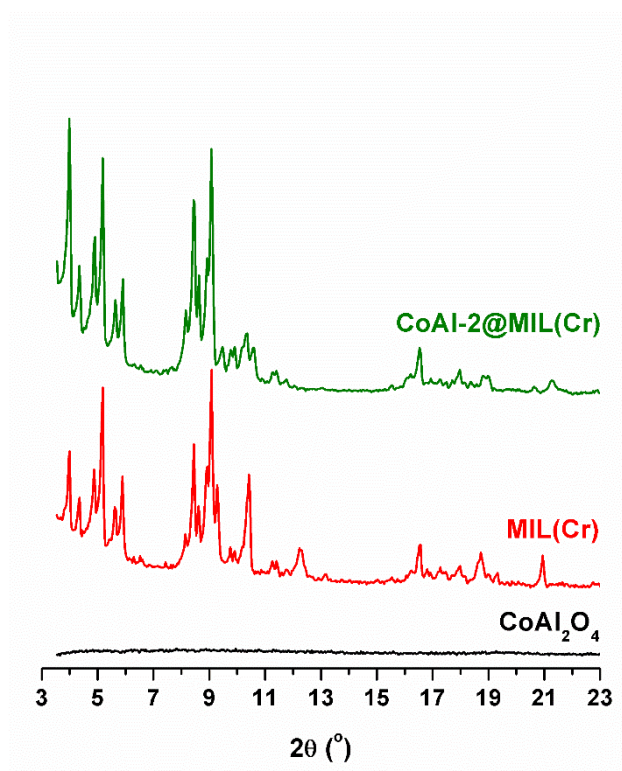

**Figure S3.** Powder XRD patterns of  $\text{CoAl}_2\text{O}_4$  nanoparticles, the solid support MIL-101 and the  $\text{CoAl-2@MIL(Cr)}$  composite in the  $3\text{-}23^{\circ}$  range.

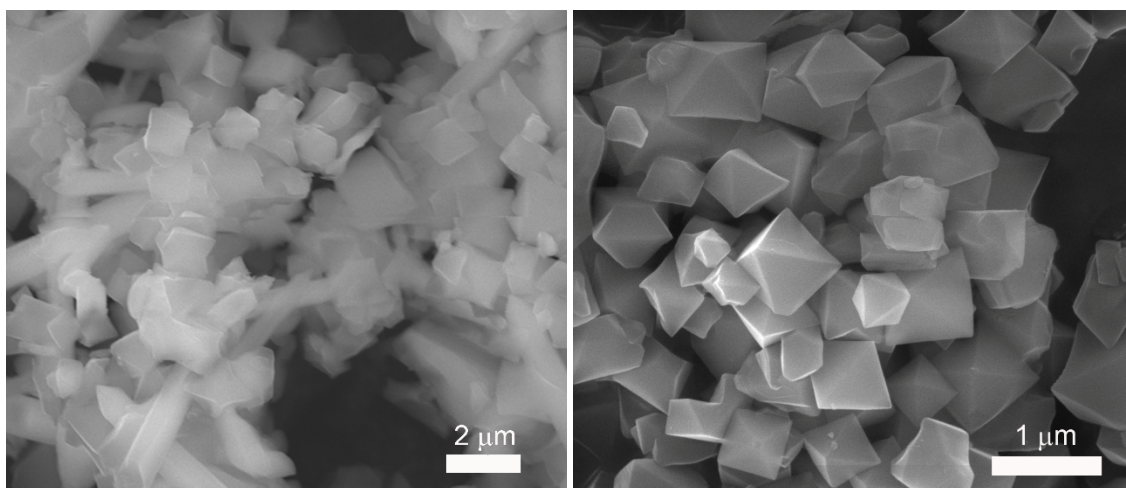

**Figure S4.** SEM image of the CoAl-1@MIL(Cr) (left) and CoAl-2@MIL(Cr) (right) composite materials.

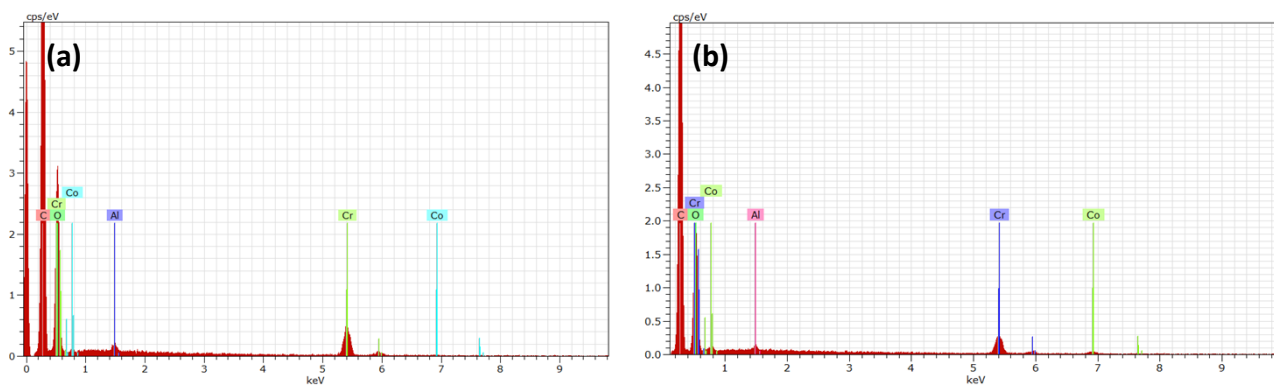

**Figure S5.** EDX spectra of the CoAl-1@MIL(Cr) composite (a) before and (b) after catalysis.

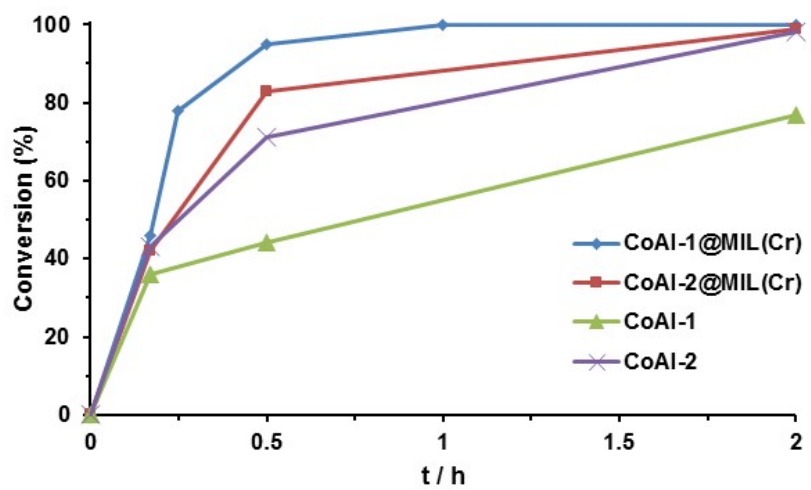

**Figure S6.** Kinetic profiles for the oxidation of thioanisole using the isolated nanoparticles and the corresponding composite materials.

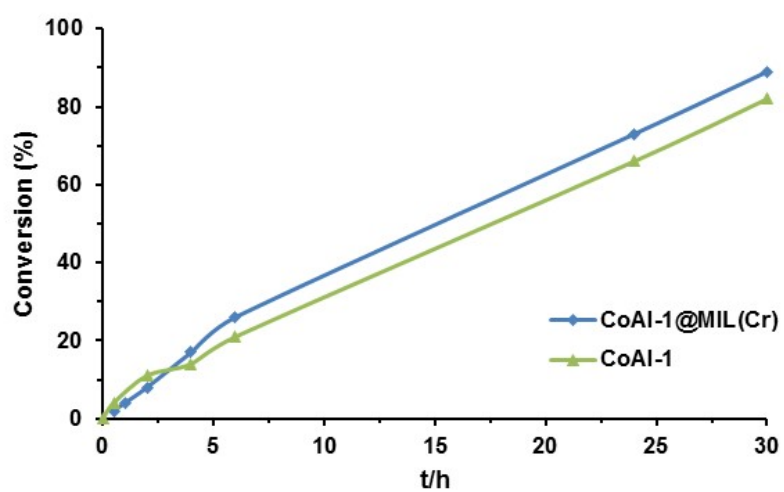

**Figure S7.** Kinetic profiles for the oxidation of styrene using the isolated CoAl-1 nanoparticles and the corresponding CoAl-1@MIL(Cr) composite material.

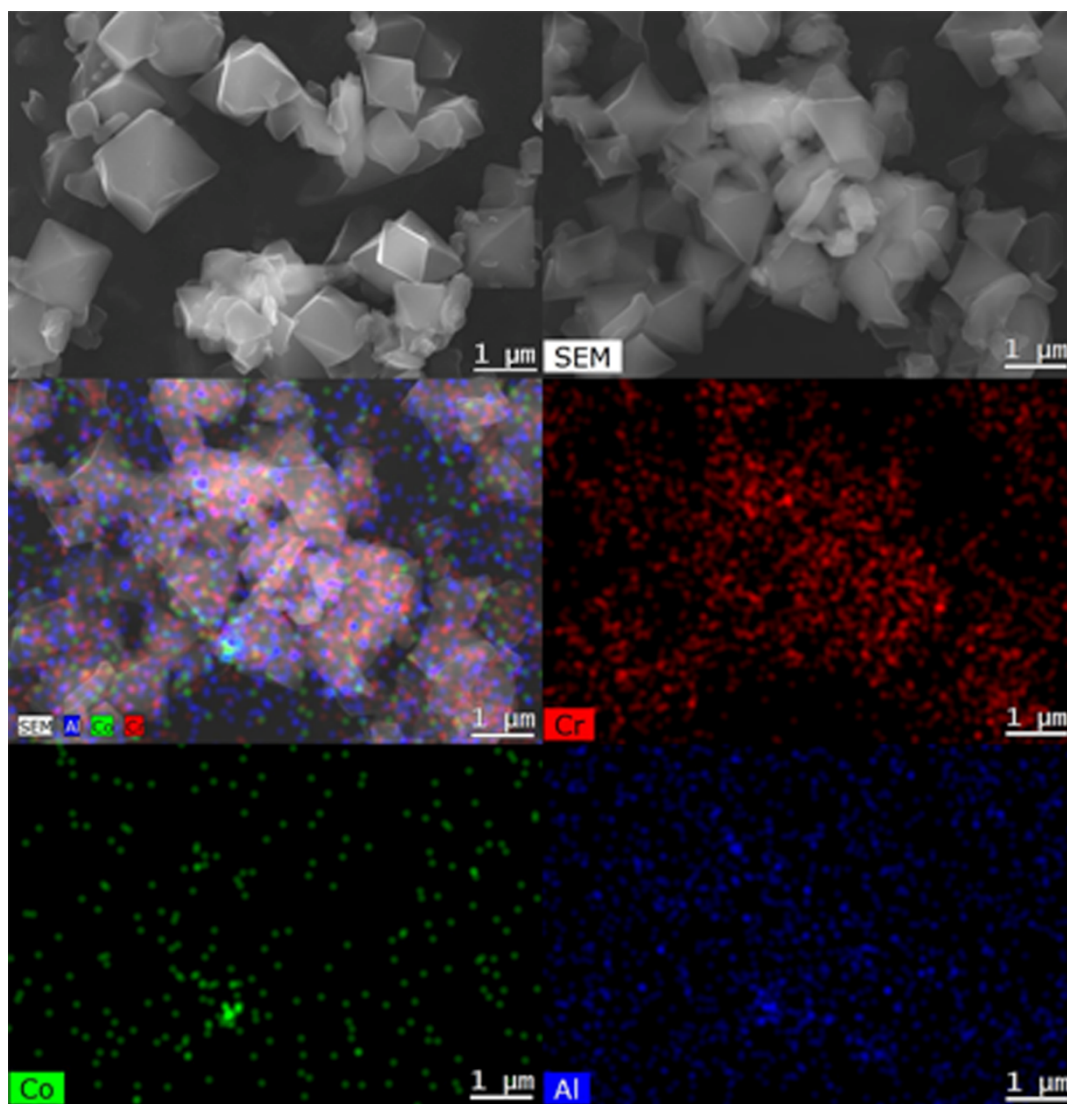

**Figure S8.** SEM image and elemental mapping images for CoAl-1@MIL(Cr)-ac (ac stands for after catalysis).
